# Supplementary figures and images for: Differences in hypothalamic type 2 deiodinase ubiquitination explain localized sensitivity to thyroxine
Source: JCI journal article supplement (doi:10.1172/jci77588), 2015-01-02

**A**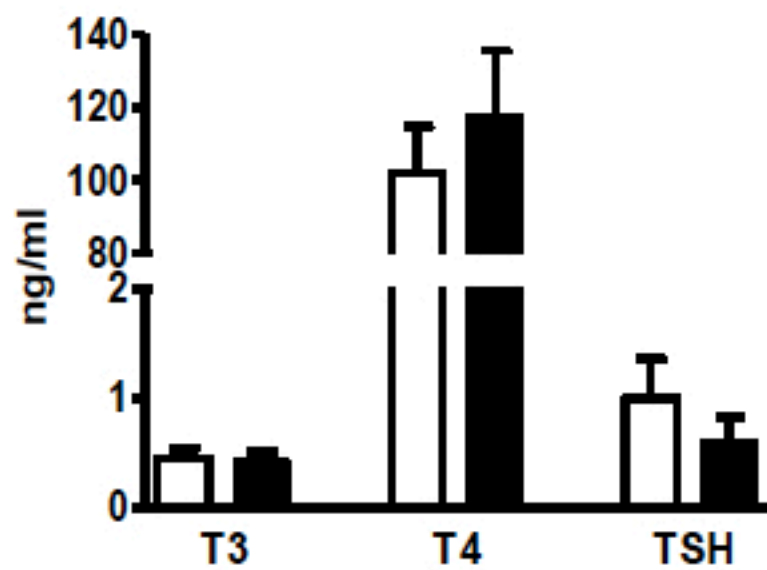**B**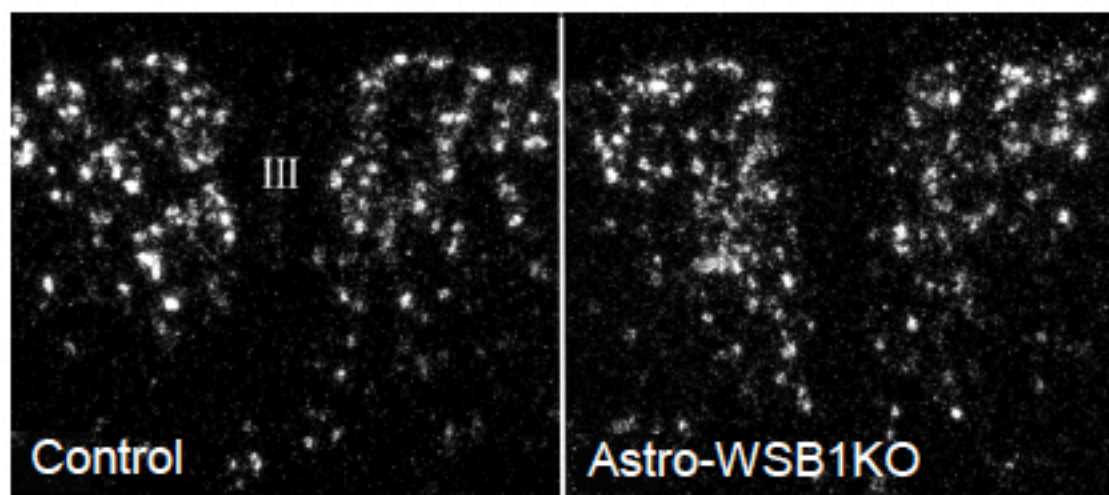

Supplement: sd1 [file 1]
